# Supplementary material for: Endothelial c-Myc knockout disrupts metabolic homeostasis and triggers the development of obesity
Source: PubMed Central journal article supplement (PMC11294153; doi:10.3389/fcell.2024.1407097), 2024-07-19
Supplement: DataSheet1.pdf [file DataSheet1.pdf]

**Supplementary Table 1 – Morphometric analysis of white adipose tissue harvested from control and endothelial c-Myc mice**

| Parameters                           | Females          |                                   | Males            |                                                 |
|--------------------------------------|------------------|-----------------------------------|------------------|-------------------------------------------------|
|                                      | CT               | EC-Myc KO                         | CT               | EC-Myc KO                                       |
| Area ( $\mu\text{m}^2$ )             | 44.19 $\pm$ 4.67 | 47.22 $\pm$ 5.48                  | 54.45 $\pm$ 6.78 | 70.18 $\pm$ 7.78                                |
| Diameter ( $\mu\text{m}$ )           | 7.17 $\pm$ 0.40  | 7.28 $\pm$ 0.48                   | 7.88 $\pm$ 0.50  | 9.04 $\pm$ 0.49                                 |
| Volume (pL)                          | 0.25 $\pm$ 0.03  | 0.28 $\pm$ 0.04                   | 0.34 $\pm$ 0.06  | 0.49 $\pm$ 0.08                                 |
| Mass ( $\mu\text{g}$ ) $\times 10^4$ | 2.3 $\pm$ 0.3    | 2.6 $\pm$ 0.4                     | 3.1 $\pm$ 0.5    | 4.5 $\pm$ 0.7                                   |
| Adipocyte number $\times 10^9$       | 3.8 $\pm$ 0.4    | <b>5.93 <math>\pm</math> 0.8*</b> | 6.2 $\pm$ 3.3    | 6.9 $\pm$ 3.5                                   |
| Adipocyte Size Frequency             | CT               | EC-Myc KO                         | CT               | EC-Myc KO                                       |
| Small                                | 16.59 $\pm$ 4.34 | 20.34 $\pm$ 6.37                  | 22.51 $\pm$ 4.89 | 10.81 $\pm$ 2.43                                |
| Medium                               | 21.59 $\pm$ 3.23 | 17.65 $\pm$ 2.57                  | 23.66 $\pm$ 3.42 | 15.00 $\pm$ 2.20                                |
| Large                                | 27.61 $\pm$ 2.25 | 24.81 $\pm$ 2.82                  | 24.47 $\pm$ 1.97 | 29.66 $\pm$ 4.07                                |
| Very Large                           | 34.21 $\pm$ 6.82 | 37.18 $\pm$ 6.95                  | 29.36 $\pm$ 7.62 | <b>44.45 <math>\pm</math> 7.91<sup>##</sup></b> |

Results represent mean  $\pm$  standard error. Significant findings are labeled in bold. **CT**, Control (n = 10-12); **EC-Myc KO**, Endothelial c-Myc knockout (n = 5-8). \*p<0.05 EC-Myc KO vs CT (females), \*p<0.01 very large vs medium size particles, #p<0.005 very large vs small size particles in EC-Myc KO (males).

**Supplementary Table 2 – Metabolic assessment of control and endothelial c-Myc knockout mice**

|                                                | Females      |                      | Males       |                     |
|------------------------------------------------|--------------|----------------------|-------------|---------------------|
|                                                | CT           | EC-Myc KO            | CT          | EC-Myc KO           |
| VO <sub>2</sub> (ml/kg/h) Dark                 | 3687 ± 187   | <b>3203 ± 61*</b>    | 3170 ± 232  | 2871 ± 139          |
| VO <sub>2</sub> (ml/kg/h) Light                | 3035 ± 163   | <b>2551 ± 84*</b>    | 2450 ± 187  | 2235 ± 129          |
| VCO <sub>2</sub> (ml/kg/h) Dark                | 3240.8 ± 199 | <b>2791 ± 62*</b>    | 2750 ± 235  | 2576 ± 151          |
| VCO <sub>2</sub> (ml/kg/h) Light               | 2557 ± 157   | <b>2146 ± 94*</b>    | 2063 ± 182  | 1952 ± 124          |
| Heat (Kcal/Kg/h) Dark                          | 0.44 ± 0.02  | <b>0.38 ± 0.01*</b>  | 0.51 ± 0.02 | 0.48 ± 0.02         |
| Heat (Kcal/Kg/h) Light                         | 0.36 ± 0.02  | <b>0.30 ± 0.01*</b>  | 0.39 ± 0.02 | 0.38 ± 0.02         |
| RER (VCO <sub>2</sub> /VO <sub>2</sub> ) Dark  | 0.87 ± 0.01  | 0.87 ± 0.005         | 0.86 ± 0.02 | <b>0.91 ± 0.01#</b> |
| RER (VCO <sub>2</sub> /VO <sub>2</sub> ) Light | 0.83 ± 0.01  | 0.83 ± 0.01          | 0.84 ± 0.02 | <b>0.88 ± 0.01#</b> |
| EE Dark                                        | 18059 ± 444  | <b>15658 ± 196**</b> | 14084 ± 502 | 14126 ± 665         |
| EE light                                       | 14704 ± 722  | <b>12352 ± 410*</b>  | 12049 ± 929 | 11543 ± 595         |

Results represent mean ± standard error. Significant findings are labeled in bold. **CT**, Control (n = 5-7); **EC-Myc KO**, Endothelial c-Myc knockout (n = 8-11). VO<sub>2</sub>, Volume of oxygen consumed; VCO<sub>2</sub>, Volume of carbon dioxide produced; RER, Respiratory Exchange Ratio; EE, Energy expenditure. \*p < 0.05 vs. CT female, \*\*p < 0.01 vs. CT female, #p < 0.05 vs. CT male.

**Supplementary Table 3 – Echocardiography analysis of control and endothelial c-Myc overexpression mice under control and western diet**

| <b>MV FLOW</b>            | <b>CT-CTD</b>  | <b>CT-WD</b>           | <b>OE-CTD</b>        | <b>OE-WD</b>            |
|---------------------------|----------------|------------------------|----------------------|-------------------------|
| A' (mm/s)                 | -34.32 ± 8.55  | -27.16 ± 3.07          | -34.69 ± 6.17        | -29.75 ± 6.05           |
| E' (mm/s)                 | -30.45 ± 2.58  | -20.57 ± 5.53          | -28.02 ± 7.48        | -27.44 ± 1.35           |
| MV AET (ms)               | 51.94 ± 5.28   | 48.89 ± 3.78           | 49.72 ± 6.91         | 52.15 ± 3.88            |
| IVCT (ms)                 | 6.25 ± 1.10    | <b>10.56 ± 1.73*</b>   | 8.43 ± 1.70          | <b>7.10 ± 1.42#</b>     |
| IVRT (ms)                 | 14.34 ± 0.94   | 15.83 ± 3.31           | 13.70 ± 1.12         | 12.78 ± 1.88            |
| MV A (mm/s)               | 511.11 ± 56.83 | <b>209.88 ± 68.19*</b> | 382.80 ± 34.31       | <b>427.28 ± 162.99#</b> |
| MV E (mm/s)               | 666.01 ± 85.67 | 784.93 ± 22.25         | 804.09 ± 137.85      | 823.61 ± 75.14          |
| LV MPI                    | 0.39 ± 0.04    | <b>0.54 ± 0.08*</b>    | 0.45 ± 0.06          | <b>0.38 ± 0.04#</b>     |
| MV E/A                    | 1.31 ± 0.13    | <b>3.99 ± 1.15*</b>    | 2.10 ± 0.35          | <b>2.18 ± 0.92#</b>     |
| MV E/E'                   | -22.03 ± 3.74  | -40.22 ± 11.77         | -30.39 ± 11.34       | -29.85 ± 2.38           |
| A'/E'                     | 1.11 ± 0.19    | 1.36 ± 0.22            | 1.32 ± 0.48          | 1.08 ± 0.17             |
| E'/A'                     | 0.91 ± 0.16    | 0.75 ± 0.13            | 0.84 ± 0.36          | 0.94 ± 0.17             |
| <b>LAX (Long Axis)</b>    | <b>CT-CTD</b>  | <b>CT-WD</b>           | <b>OE-CTD</b>        | <b>OE-WD</b>            |
| Heart Rate (bpm)          | 479.04 ± 45.07 | 473.65 ± 21.14         | 469.01 ± 67.06       | 435.85 ± 18.10          |
| Area;s (mm <sup>2</sup> ) | 11.32 ± 2.78   | 11.12 ± 1.03           | 11.47 ± 1.45         | 10.73 ± 2.12            |
| Area;d (mm <sup>2</sup> ) | 18.39 ± 2.62   | 18.51 ± 0.25           | 19.13 ± 1.51         | 18.88 ± 2.10            |
| Volume;s (uL)             | 18.33 ± 6.83   | 17.35 ± 2.44           | 17.89 ± 3.23         | 16.94 ± 5.91            |
| Volume;d (uL)             | 42.95 ± 7.92   | 44.38 ± 1.82           | 44.87 ± 5.49         | 44.54 ± 9.72            |
| Stroke Volume (uL)        | 24.62 ± 4.43   | 27.04 ± 4.14           | 26.98 ± 5.41         | 27.60 ± 4.13            |
| Ejection Fraction (%)     | 60.51 ± 9.89   | 60.71 ± 6.82           | 59.97 ± 7.31         | 62.70 ± 5.74            |
| Cardiac Output (mL/min)   | 15.85 ± 5.52   | 12.82 ± 2.16           | 12.44 ± 1.62         | 12.05 ± 1.81            |
| <b>SAX (Short Axis)</b>   | <b>CT-CTD</b>  | <b>CT-WD</b>           | <b>OE-CTD</b>        | <b>OE-WD</b>            |
| Diameter; s (mm)          | 2.56 ± 0.39    | 2.34 ± 0.18            | <b>1.94 ± 0.15*</b>  | 2.24 ± 0.32             |
| Diameter; d (mm)          | 3.79 ± 0.39    | 3.65 ± 0.24            | 3.33 ± 0.17          | 3.57 ± 0.29             |
| Fractional shortening (%) | 32.64 ± 4.16   | 35.86 ± 1.00           | <b>41.82 ± 1.78*</b> | 37.38 ± 4.23            |
| LV mass corrected (mg)    | 114.12 ± 13.07 | <b>154.71 ± 12.50*</b> | 121.57 ± 5.12        | <b>122.27 ± 7.92#</b>   |
| LVAW;s (mm)               | 1.44 ± 0.07    | <b>1.76 ± 0.13*</b>    | 1.52 ± 0.05          | <b>1.62 ± 0.07#</b>     |
| LVAW;d (mm)               | 1.05 ± 0.02    | <b>1.27 ± 0.06*</b>    | 0.99 ± 0.10          | <b>1.19 ± 0.03*</b>     |
| LVPW;s (mm)               | 1.30 ± 0.28    | 1.56 ± 0.04            | <b>1.73 ± 0.18*</b>  | <b>1.43 ± 0.13*</b>     |
| LVPW;d (mm)               | 0.91 ± 0.25    | <b>1.22 ± 0.09*</b>    | <b>1.33 ± 0.12*</b>  | <b>1.00 ± 0.12*</b>     |

Results are expressed as mean ± standard deviation (n = 3-4). Significant findings are labeled in bold. **CT**, Control; **EC-Myc OE**, Endothelial c-Myc Overexpression; **CTD**, Control diet; **WD**, Western diet. **A'**, Velocity at A' Pulse Wave Tissue Doppler; **E'**, Velocity at E' Pulse Wave Tissue Doppler; **MV ET**, Mitral valve Ejection Time; **IVCT**, Isovolumetric Contraction Time; **IVRT**, Isovolumetric Relaxation Time; **MVA**, Pulse Wave Doppler mitral valve atrial peak; **MVE**, Pulse Wave Doppler Mitral valve early peak; **LV MPI**, Left Ventricular Myocardial Performance Index; **MV E/A**, Mitral valve E to A ratio; **MV E/E'**, Mitral valve E velocity to E' velocity ratio; **A'/E'**, Ratio of A' velocity to E' velocity (PW Tissue Doppler Mode); **E'/A'**, Ratio of E' velocity to A' velocity; **Area;s**, Systolic area; **Area;d**, Diastolic area; **Volume;s**, Systolic volume; **Volume;d**, Diastolic volume; **LVAW;S**, Left ventricular anterior wall (systole); **LVAW;d**, Left ventricular anterior wall (diastole); **LVPW;s**, Left ventricular posterior wall (systole); **LVPW;d**, Left ventricular posterior wall (diastole). \*p≤0.05 vs CT-CTD; #p≤0.05 vs CT-WD; \*p≤0.05 vs OE-CTD.

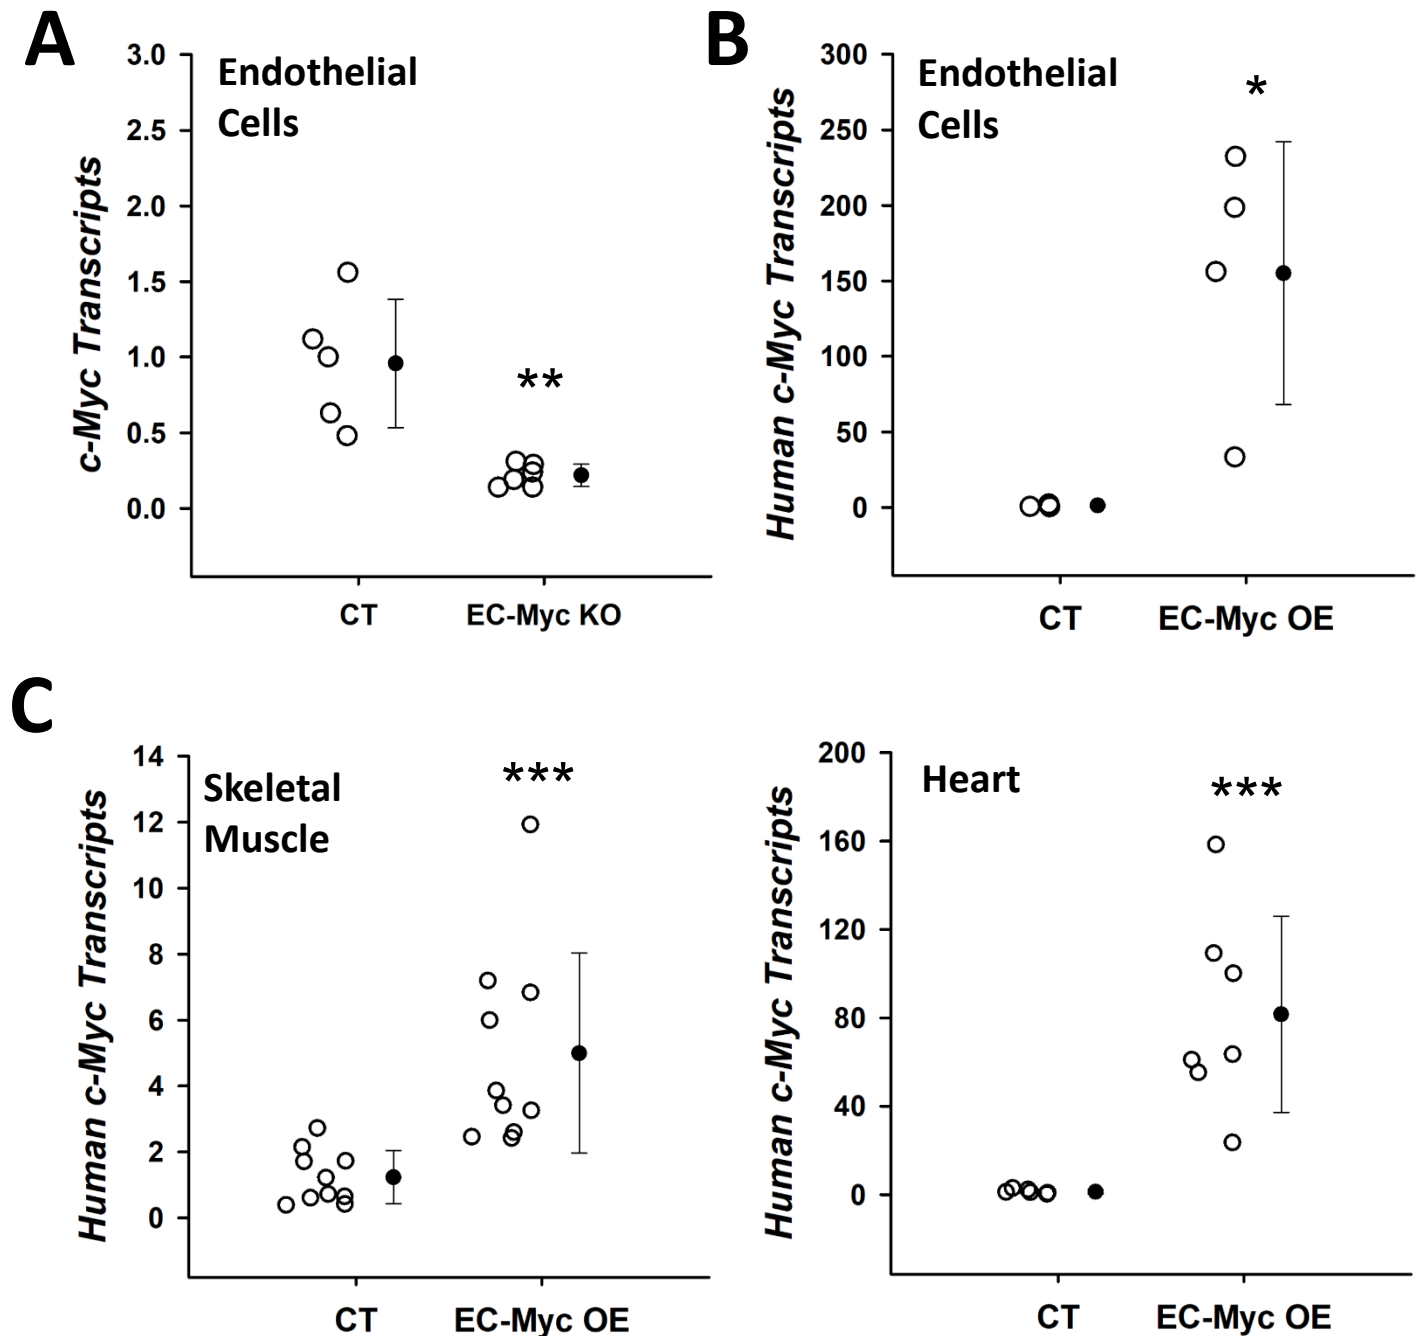

**Supplementary Figure 1. Gene expression analysis of c-Myc in tissues and CD31+ sorted cells from endothelial c-Myc knockout and overexpression mice by qPCR. (A) Mouse c-Myc expression in endothelial cells sorted from knockout hearts (n = 5-6). (B) Human c-Myc overexpression in endothelial cells sorted from overexpression hearts (n = 4). (C) Human c-Myc overexpression in skeletal muscle (n = 10) and heart (n = 7) harvested from overexpression mice. Results are expressed as fold change relative to control. CT, control; EC-Myc KO, endothelial c-Myc knockout; EC-Myc OE, endothelial c-Myc overexpression. \*p<0.03; \*\*p<0.003; \*\*\*p<0.001.**

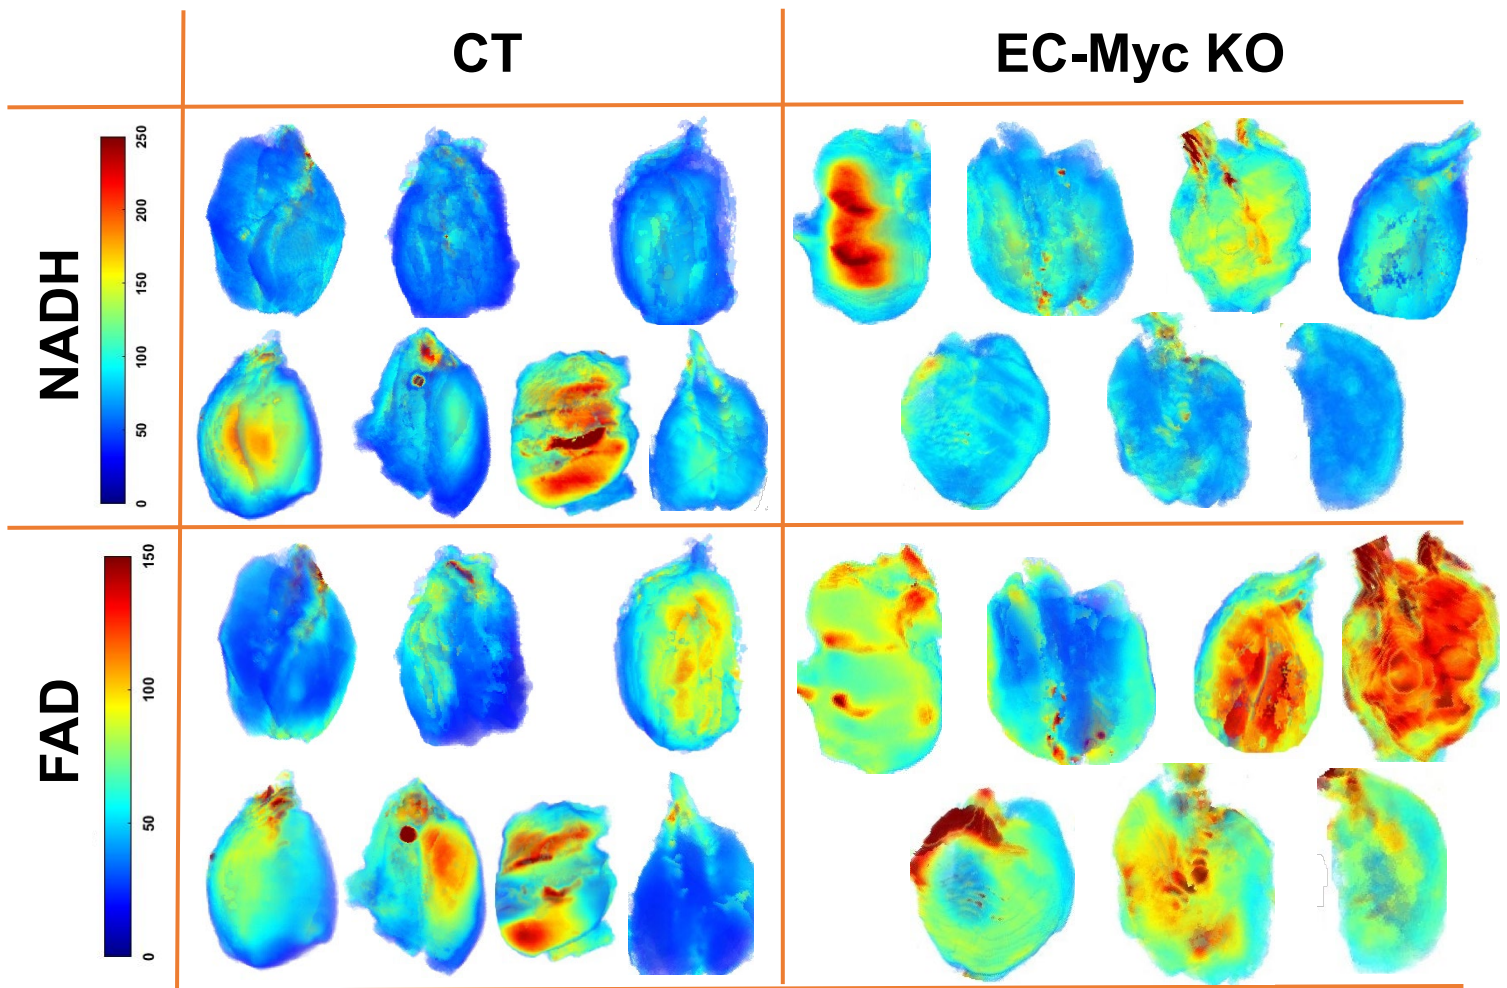

**Supplementary Figure 2.** Analysis of redox ratio in control and endothelial c-Myc knockout skeletal muscle. (A) Normalized intensities of NADH and FAD images are shown. For each group, seven representative muscle images are presented. CT, Control (n = 7); EC-Myc KO, Endothelial c-Myc knockout (n = 7).

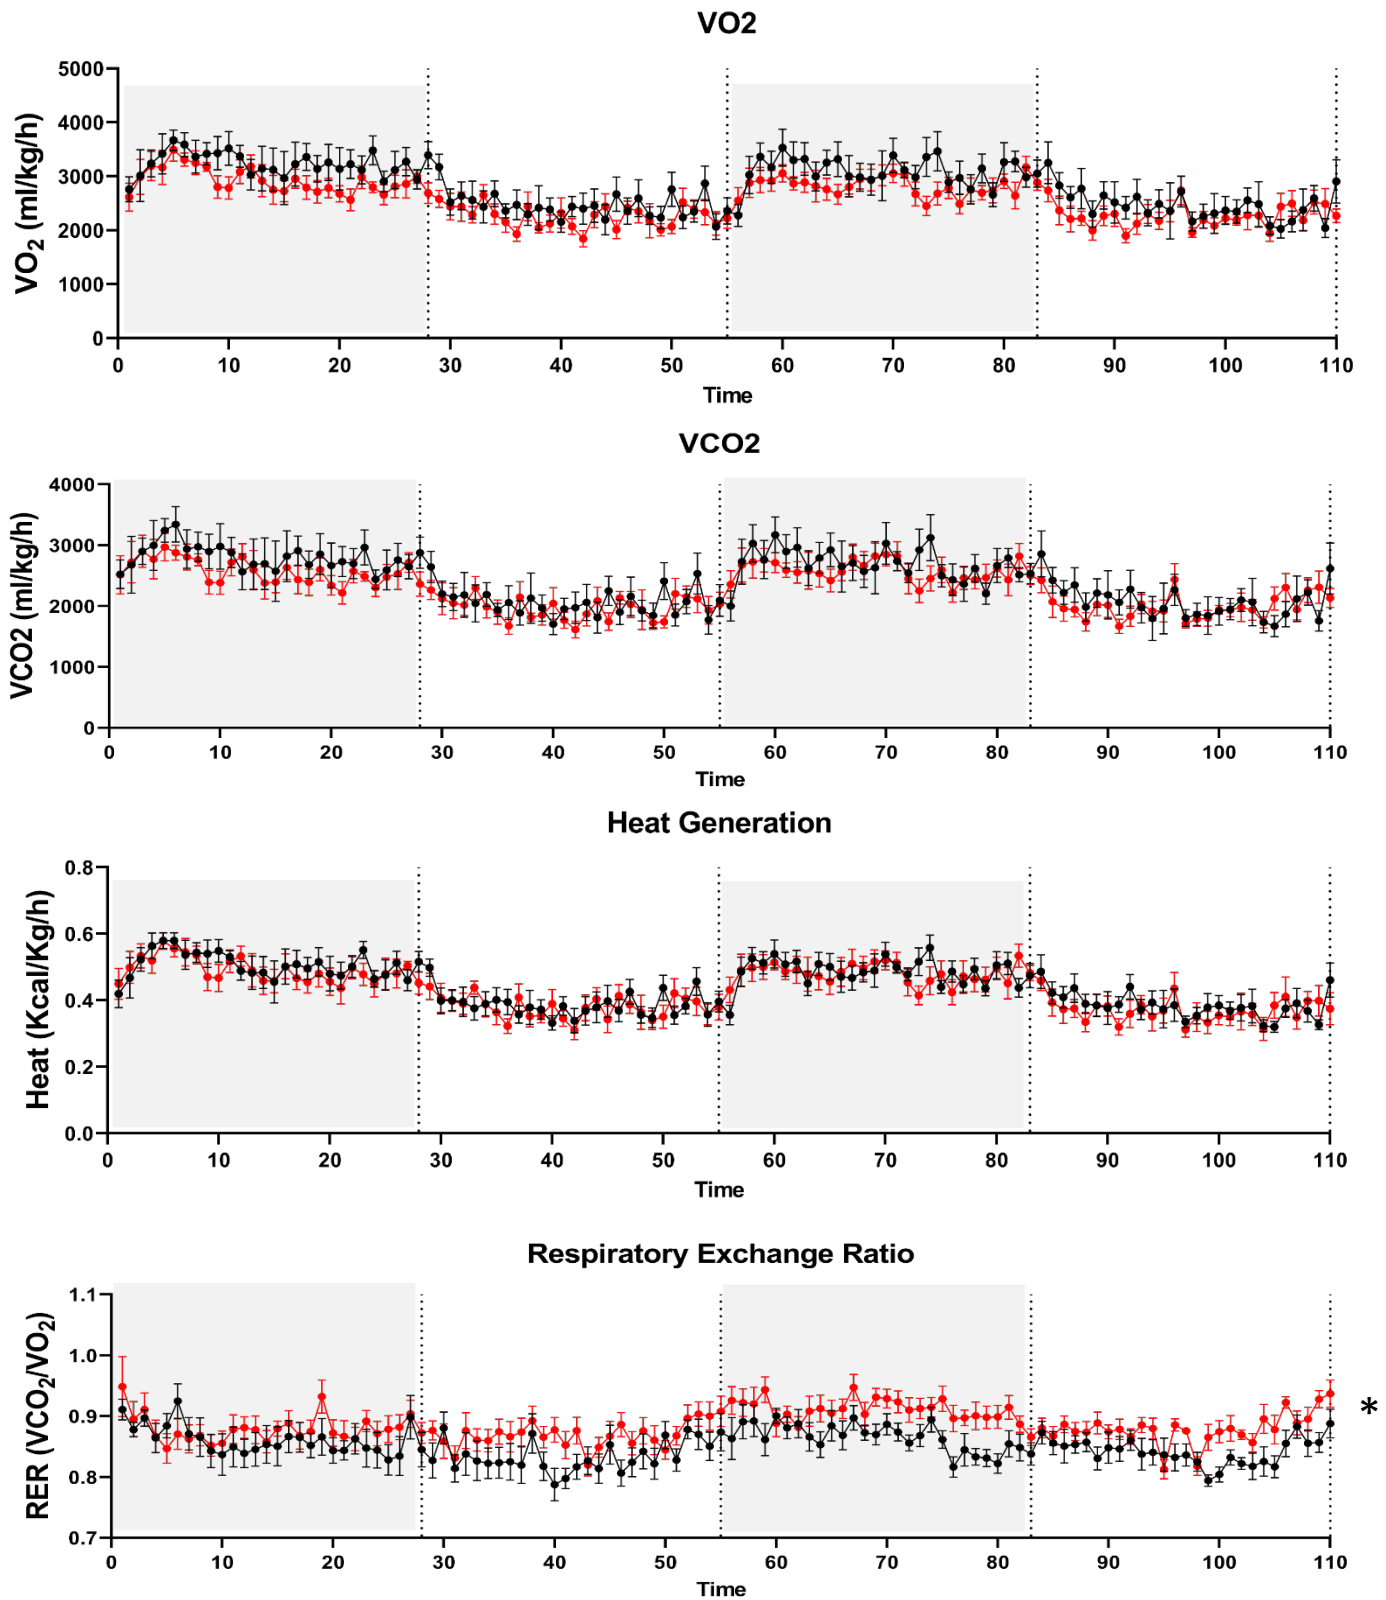

**Supplementary Figure 3A.** Oxygen consumption (VO<sub>2</sub>), Carbon dioxide release (VCO<sub>2</sub>), Heat production (Heat) and Respiratory exchange ratio (RER) by indirect calorimetry using the Oxymax Comprehensive Lab Animal Monitoring System (CLAMS) in Control (CT) and Endothelial c-Myc knockout (EC-Myc KO) males. Black lines, CT (n = 7); Red lines, EC-Myc KO (n = 7). Grey, dark; White, light. \*p<0.05, \*\*p<0.01.

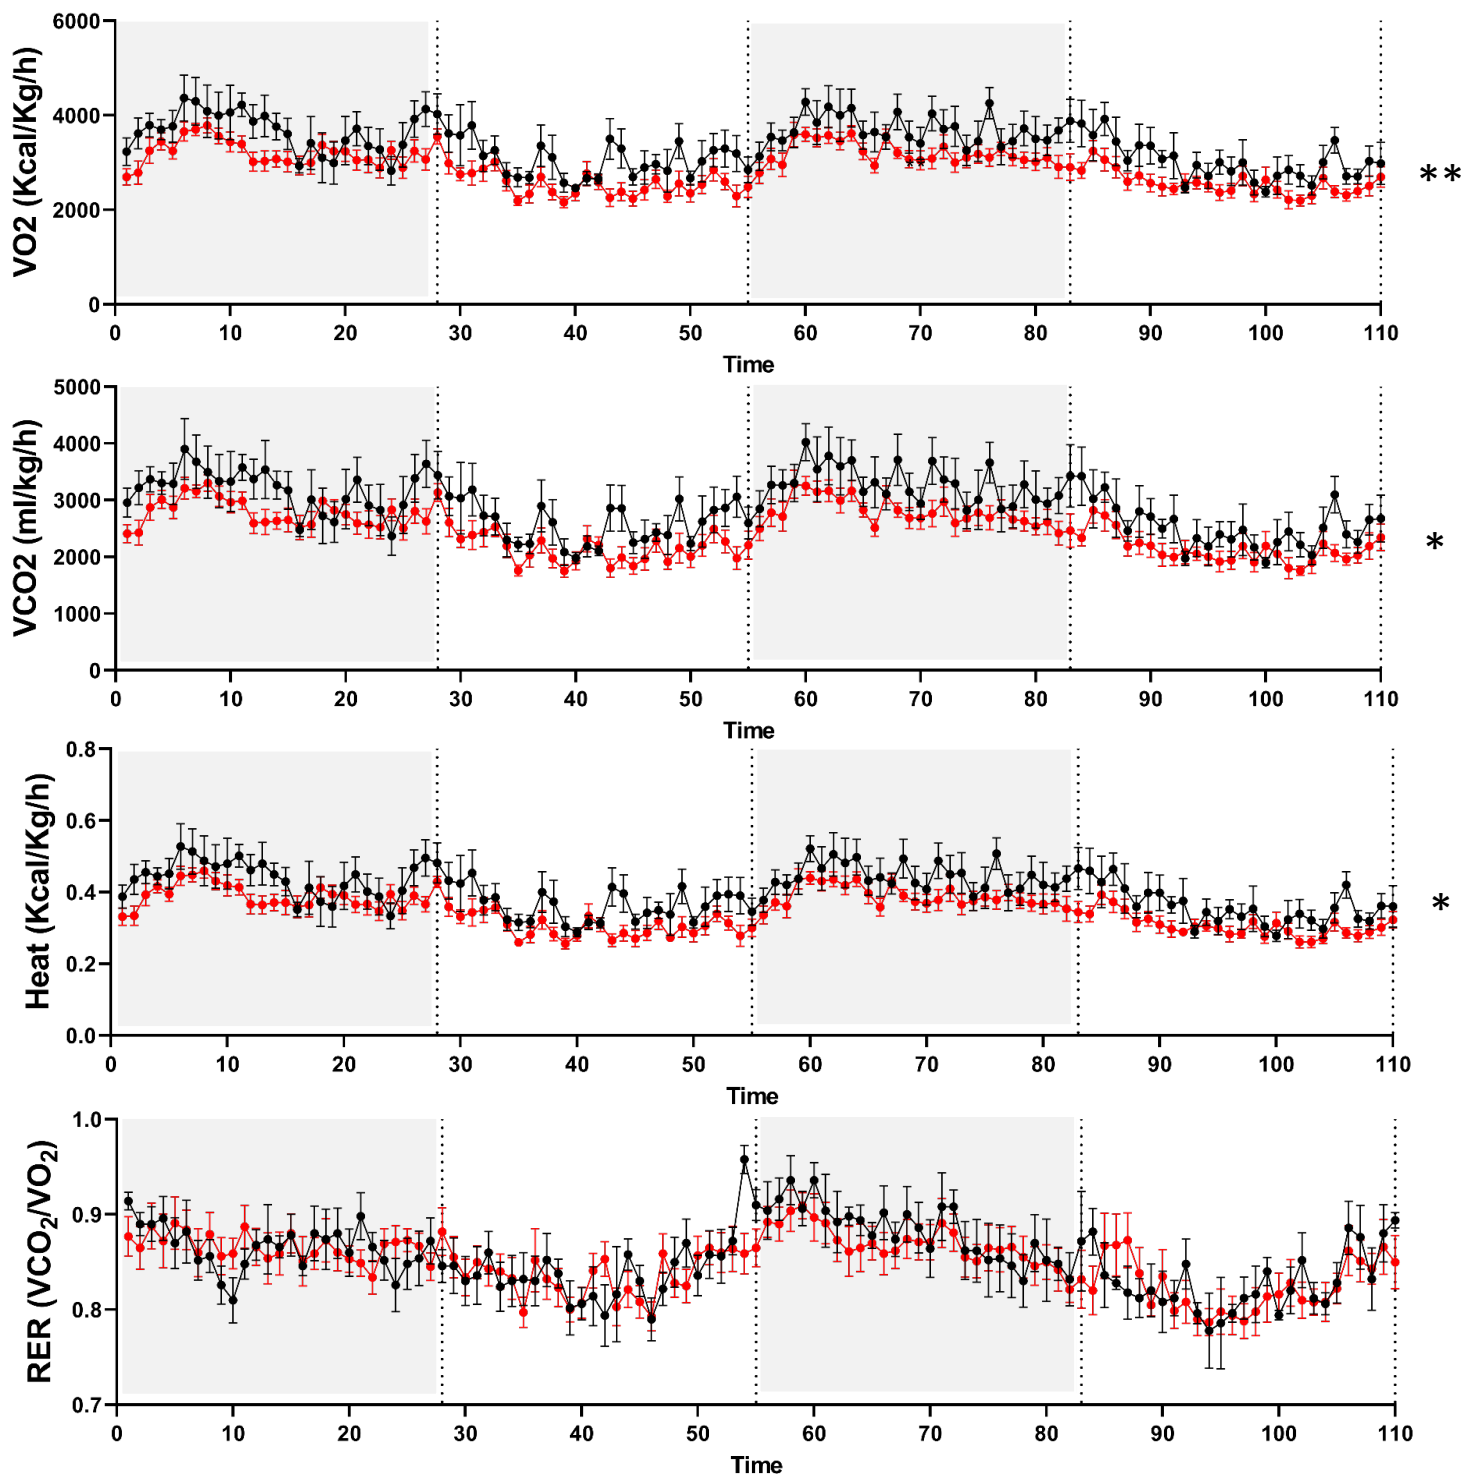

**Supplementary Figure 3B.** Oxygen consumption ( $VO_2$ ), Carbon dioxide release ( $VCO_2$ ), Heat production (Heat) and Respiratory exchange ratio (RER) by indirect calorimetry using the Oxymax Comprehensive Lab Animal Monitoring System (CLAMS) in Control (CT) and Endothelial c-Myc knockout (EC-Myc KO) females. Black lines, CT (n = 5); Red lines, EC-Myc KO (n = 11). Grey, dark; White, light. \* $p < 0.05$ , \*\* $p < 0.01$ .

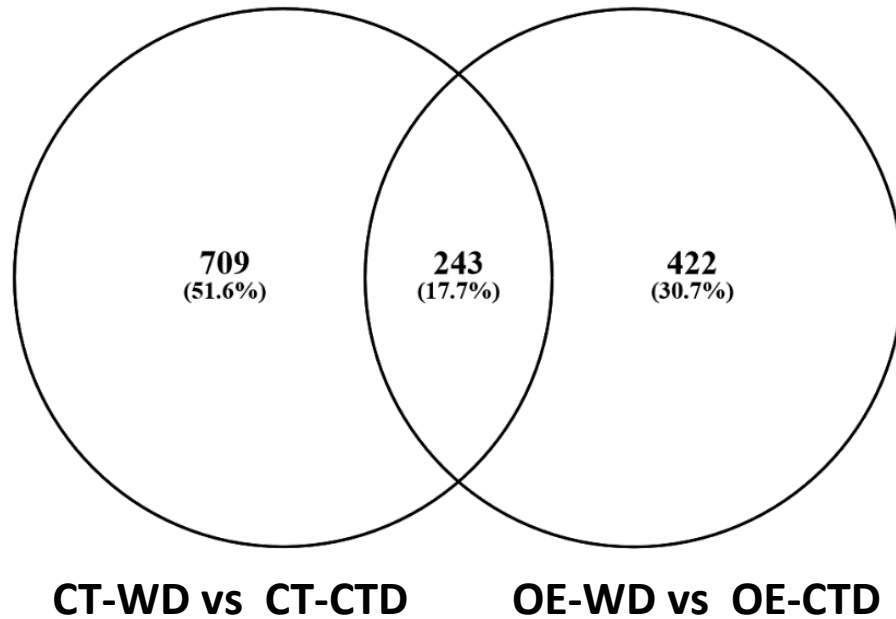

**Supplementary Figure 4.** Venn diagrams indicating the number of genes significantly altered by western diet exposure in skeletal muscle from control and endothelial c-Myc overexpression mice (n = 3-4). CT, control; OE, endothelial c-Myc overexpression; CTD, Control diet; WD, Western Diet.



## OE-WD vs CT-WD

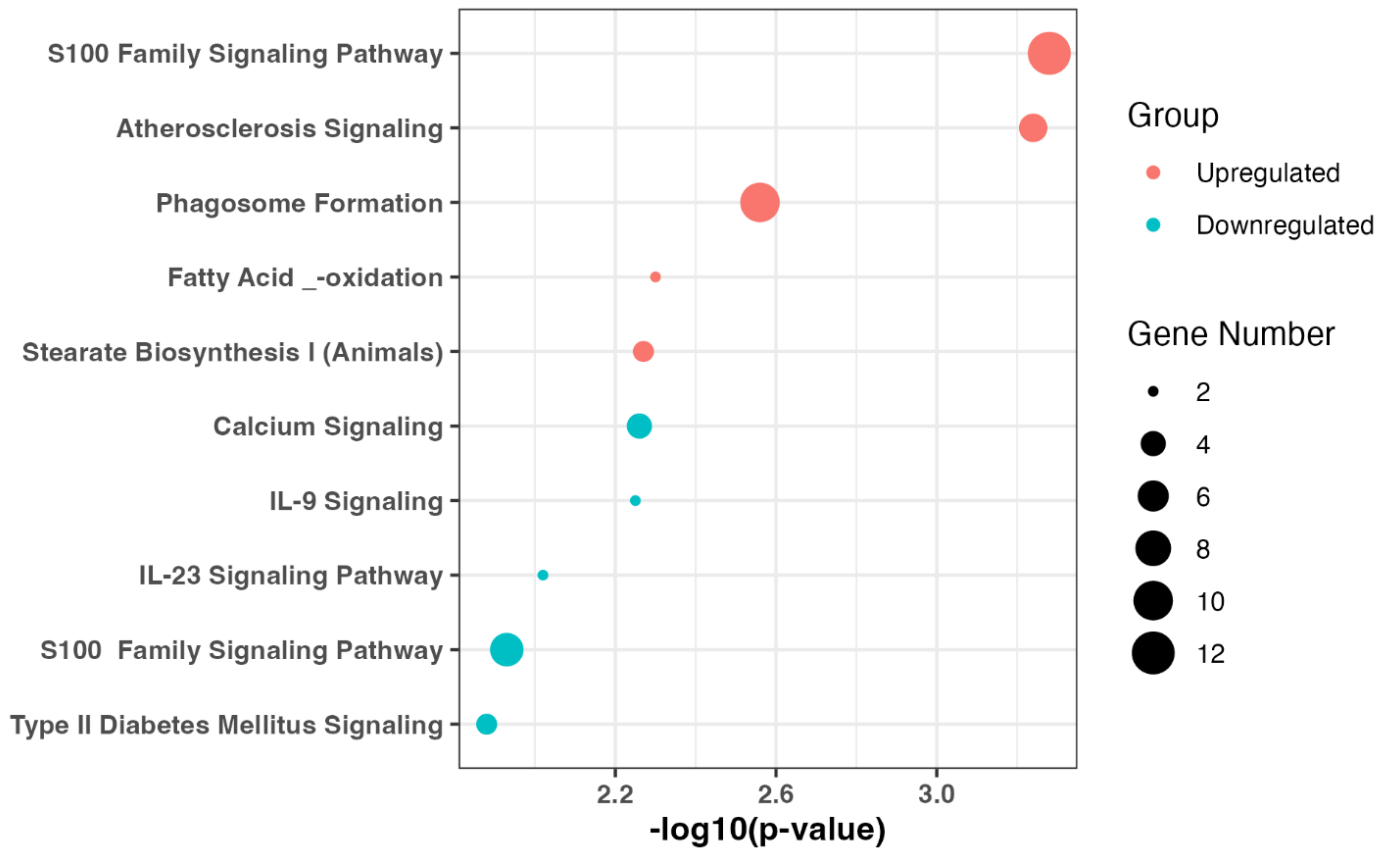

**Supplementary Figure 5.** Top canonical pathways identified by Ingenuity Pathway Analysis comparing up- and down-regulated genes in endothelial c-Myc OE skeletal muscle relative to CT under western diet. CT, Control; OE, endothelial c-Myc overexpression; WD, western diet. (n = 4).

## CT-WD vs CT-CTD

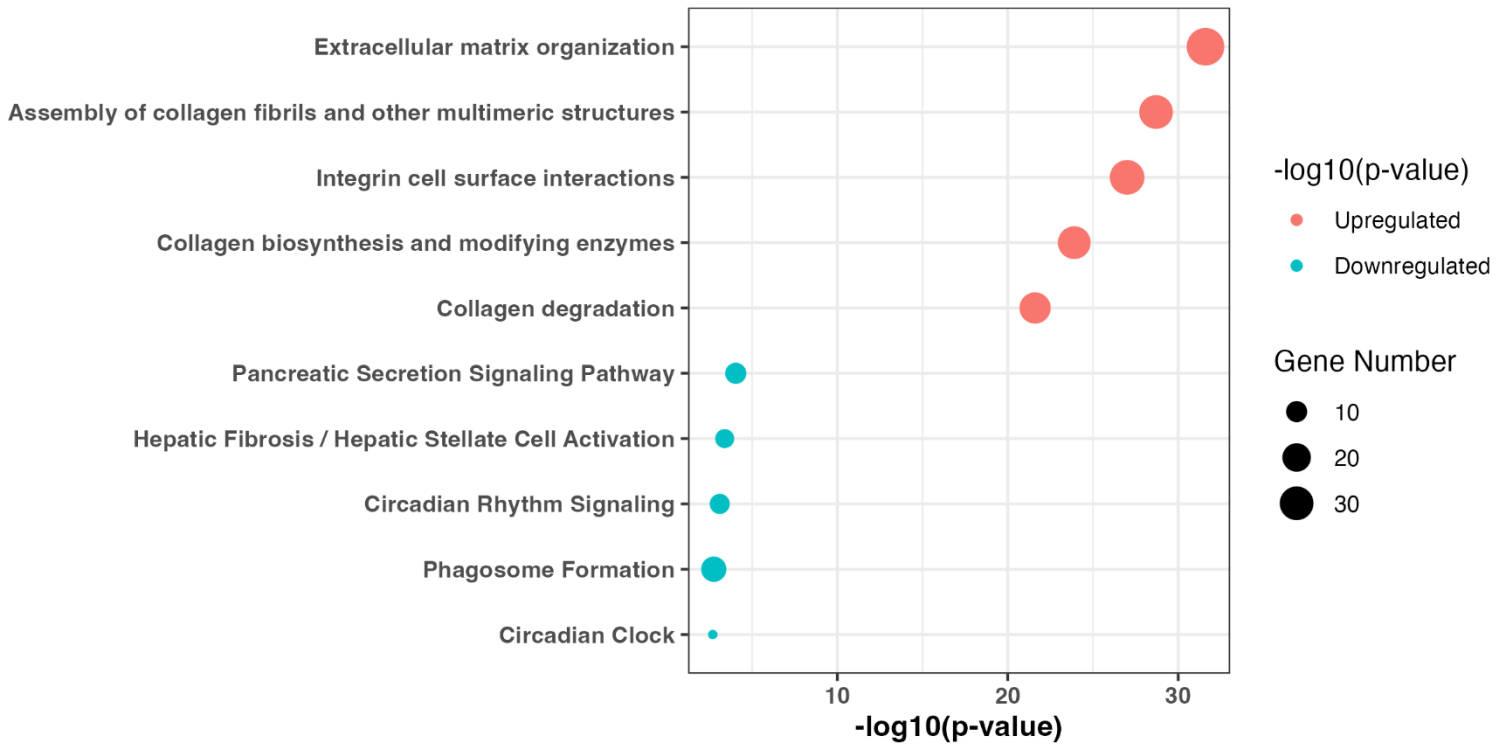

## OE-WD vs OE-CTD

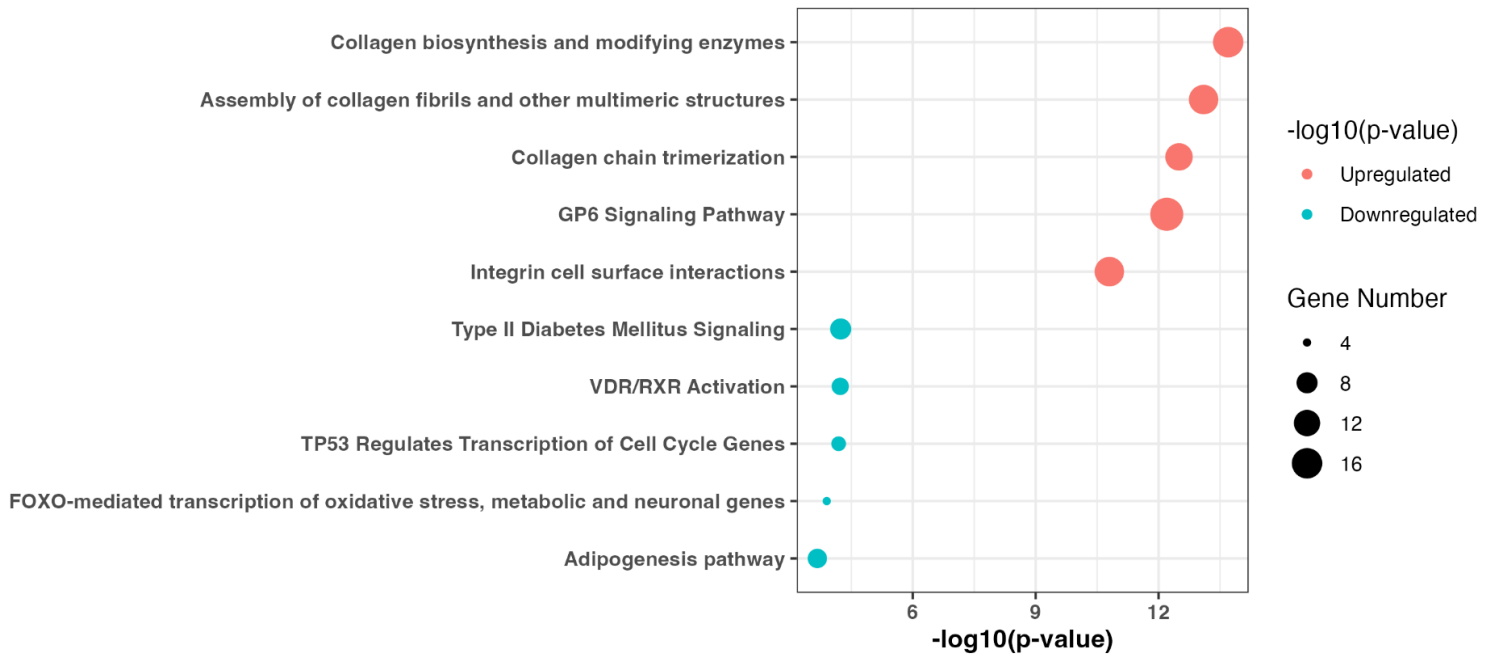

**Supplementary Figure 6.** Top canonical pathways identified by Ingenuity Pathway Analysis comparing up- and downregulated genes in endothelial c-Myc OE and control skeletal muscle under western diet relative to control diet. CT, Control; OE, endothelial c-Myc overexpression; CTD, control diet; WD, western diet. (n = 3-4).
